# Supplementary material
Source: publisher site journal article supplement (https://www.dovepress.com/article/335761)

1 **Supplemental Figure 1. Body weight changes in individual mice.** Changes in body weight in  
2 individual mice fed the HFD group and treated with (A) BSA treated, (B) 2 µg/kg IL-25  
3 administered 3 times per week for 21 days, and (C) 5 µg/kg IL-25 administered 3 times per week  
4 for 21 days. The numbers indicate the Mean±SEM before and after treatment.

5  
6 **Supplemental Figure 2. Changes in tissue weights in response to IL-25 therapy.** At  
7 euthanasia organs were harvested and weighed. (A) liver weight (g), and (B) epididymal fat  
8 weight expressed as percent of body weight, (C) subcutaneous fat weight expressed as percent  
9 of body weight, (D) spleen weight expressed as percent of body weight. \*p<0.05 and \*\* p<0.01  
10 vs NCD, ϕ p<0.05 and ϕ ϕ p<0.01 vs BSA treated HFD, n=7-8.

11  
12 **Supplemental Figure 3. Changes in fasting blood glucose levels in individual mice.** HFD  
13 fed mice were treated with (A) BSA, (B) 2 µg/kg IL-25 administered 3 times per week for 21 days,  
14 or (C) 5 µg/kg IL-25 administered 3 times per week for 21 days. The numbers indicate the  
15 Mean±SEM before and after treatment.

16  
17 **Supplemental Figure 4. Effect of IL-25 treatment on SGLT1 and GLUT 2 expression in the**  
18 **small intestine from WT and ob/ob mice.** WT or ob/ob mice were treated with BSA or IL-25 (5  
19 µg/kg) for 21 days and the expression of SGLT1 and GLUT2 in the small intestine measured.  
20 Mean±SEM, \*p<0.05, n=5.

21  
22 **Supplemental Figure 5. Effects of IL-25 on transepithelial resistance (TEER) in HFD-**  
23 **induced obesity and ob/ob mice.** Muscle-free sections of small intestinal mucosae were  
24 taken from mice fed the NCD, the HFD and treated with IL-25, panel A, or ob/ob mice treated with  
25 IL-25, panel B and mounted in modified microsnapwells to determine changes transepithelial  
26 electrical resistance (TEER), Mean±SEM, n=5, \*\*p<0.01 vs NCD panel A and BSA treated, panel  
27 B.

28

29 **Supplemental Figure 6. Schematic summarizing the effect of IL-25 therapy on obesity-**  
30 **induced type 2 diabetes.** High fat diet (HFD) or genetically (Ob/Ob) induced obesity is  
31 associated with development of Type 2 diabetes (T2D) and the metabolic syndrome that is  
32 characterized by hyperglycemia, hepatic steatosis, enteropathy, and the presence of  
33 proinflammatory macrophages (M1) and CD4+ T cells (Th1/Th17). Therapeutic administration of  
34 the anti-inflammatory cytokine IL-25 has beneficial effects on glucose metabolism leading to  
35 attenuation or normalization of the T2D metabolic syndrome. Importantly, the effects of IL-25 are  
36 independent of weight loss and are maintained for a period of time after cessation of therapy.  
37

Supplemental Figure 1.

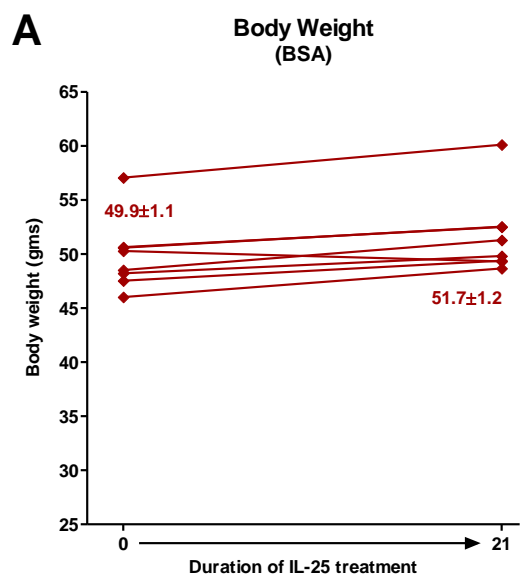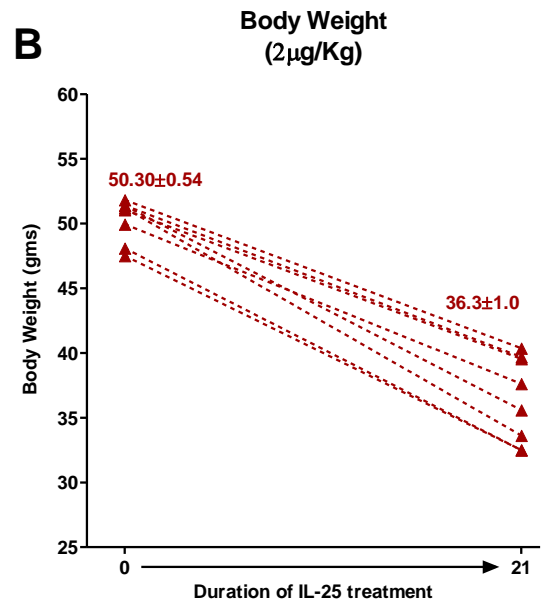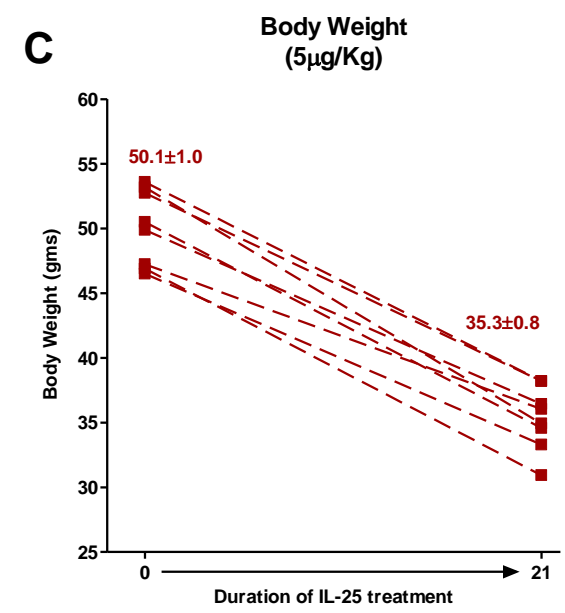

Supplemental Figure 2.

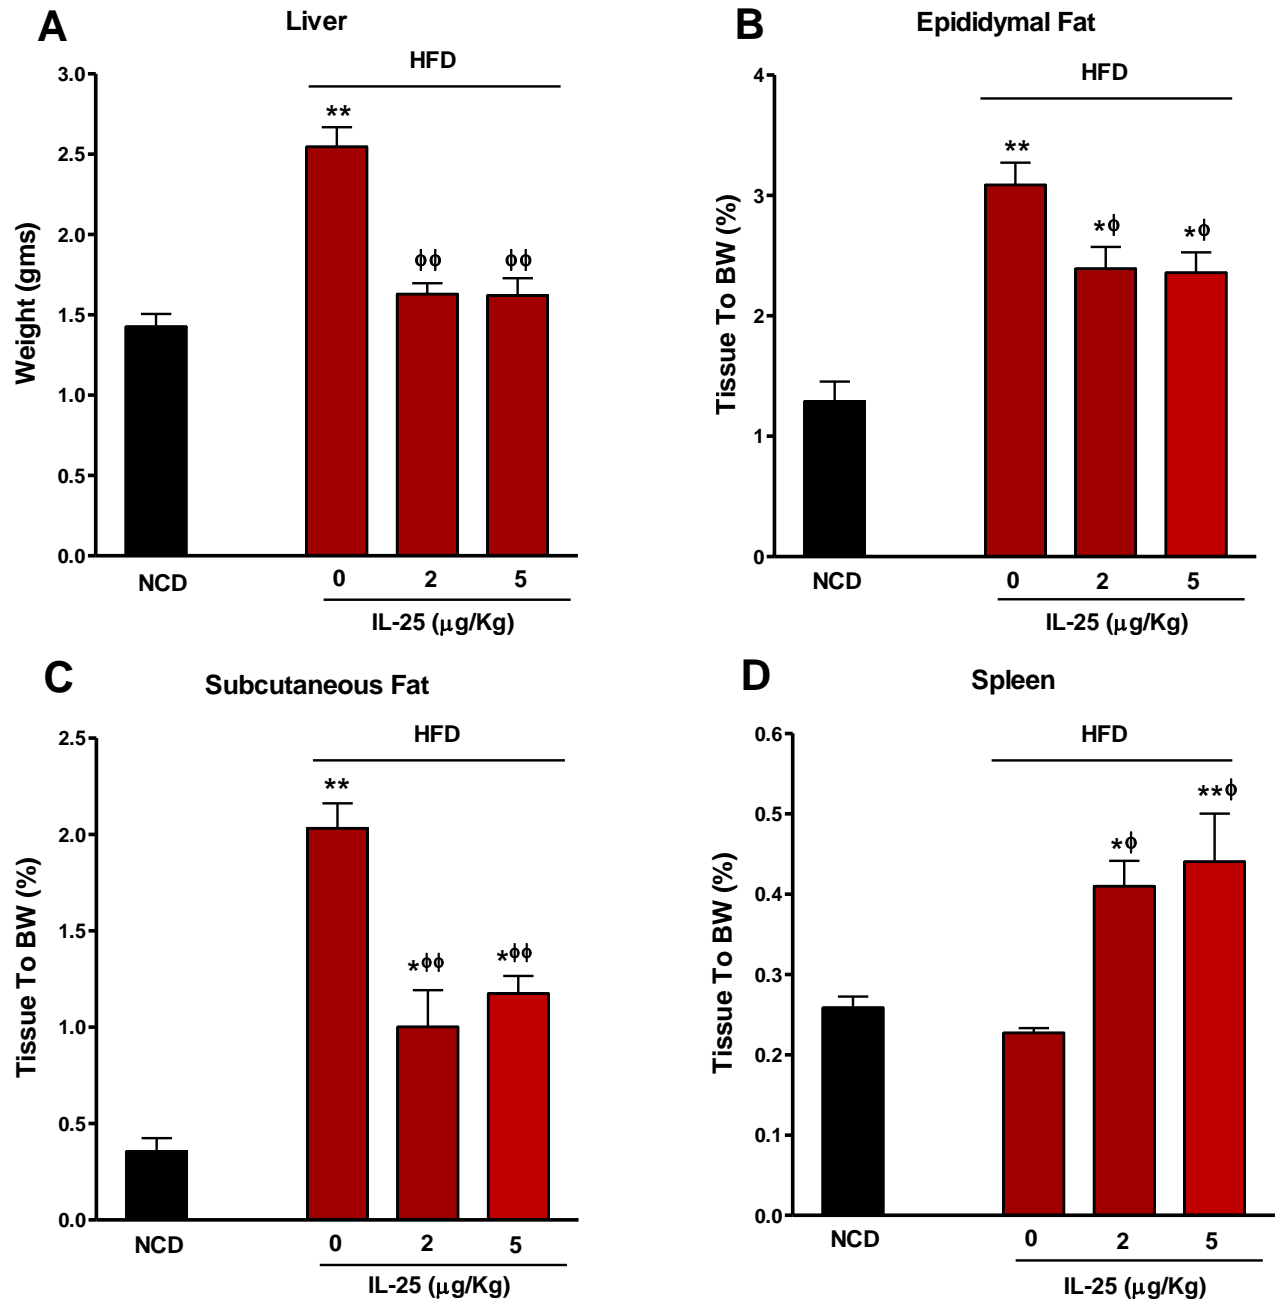

Supplemental Figure 3.

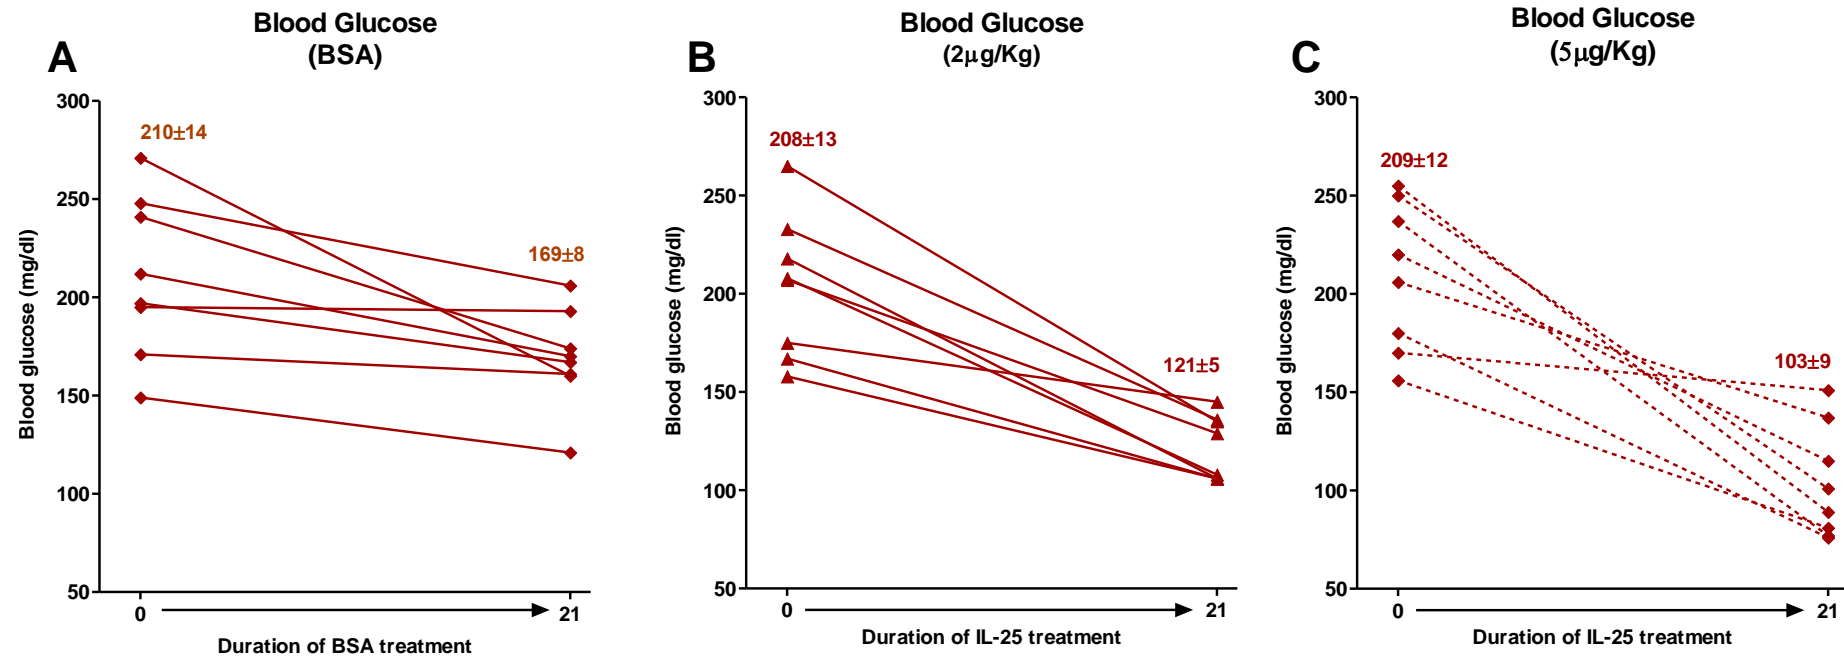

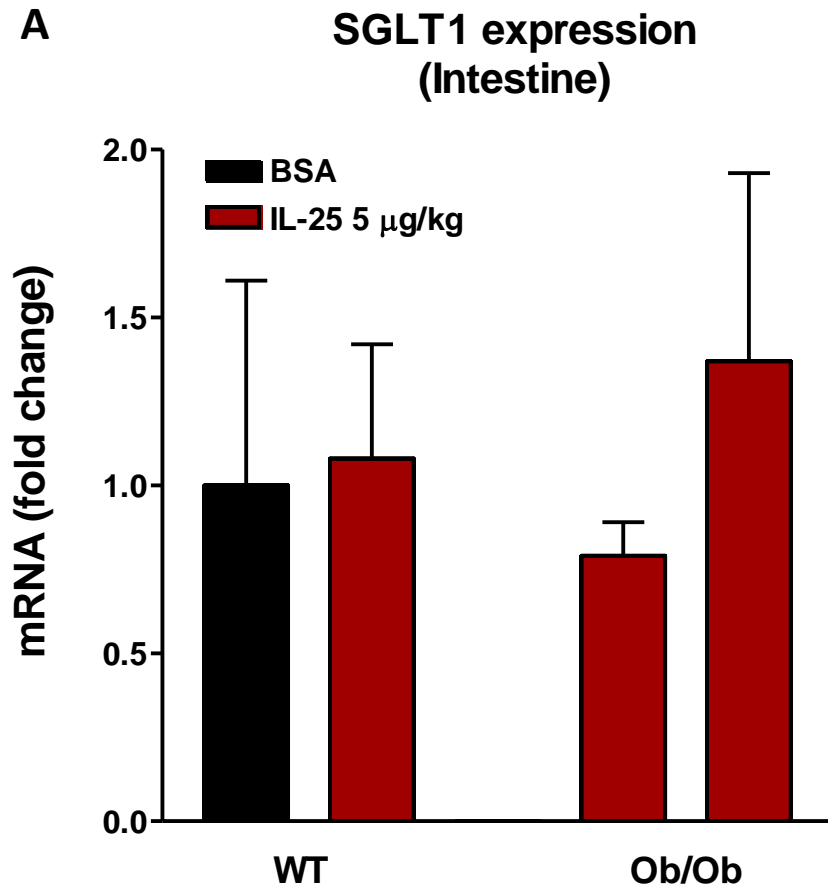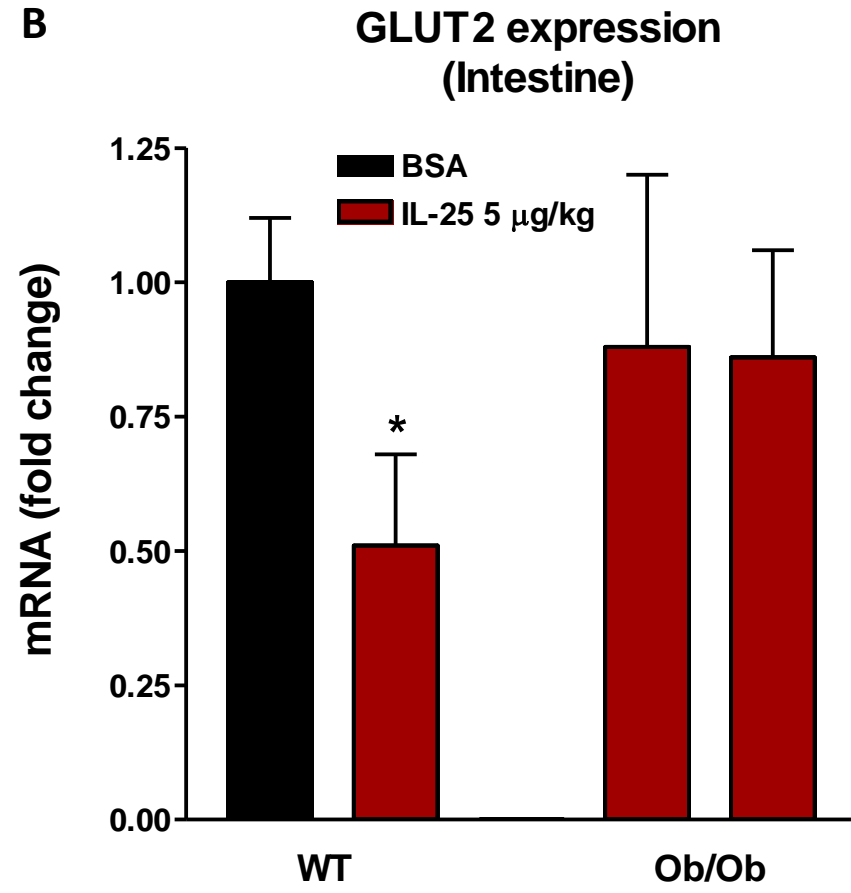

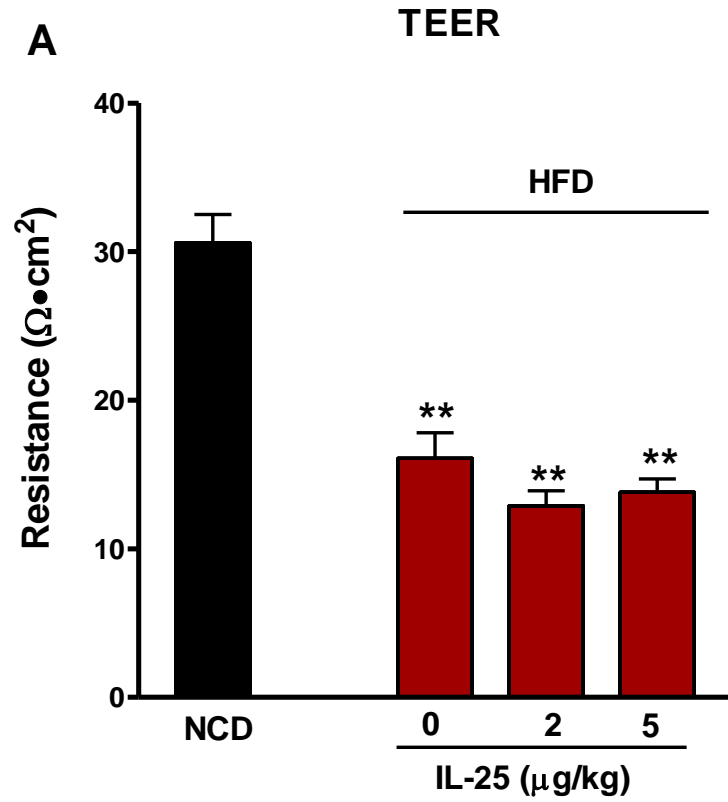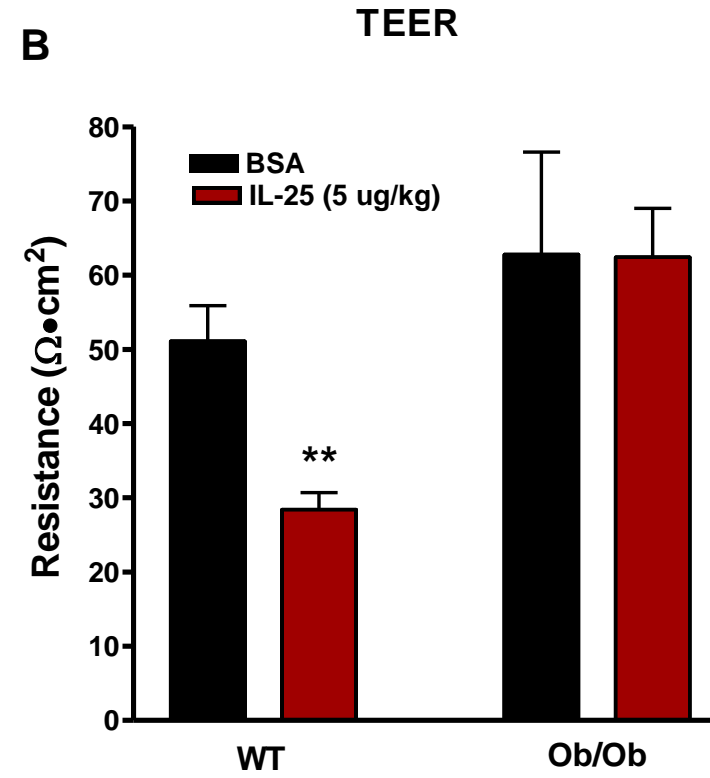

Supplemental Figure 6.

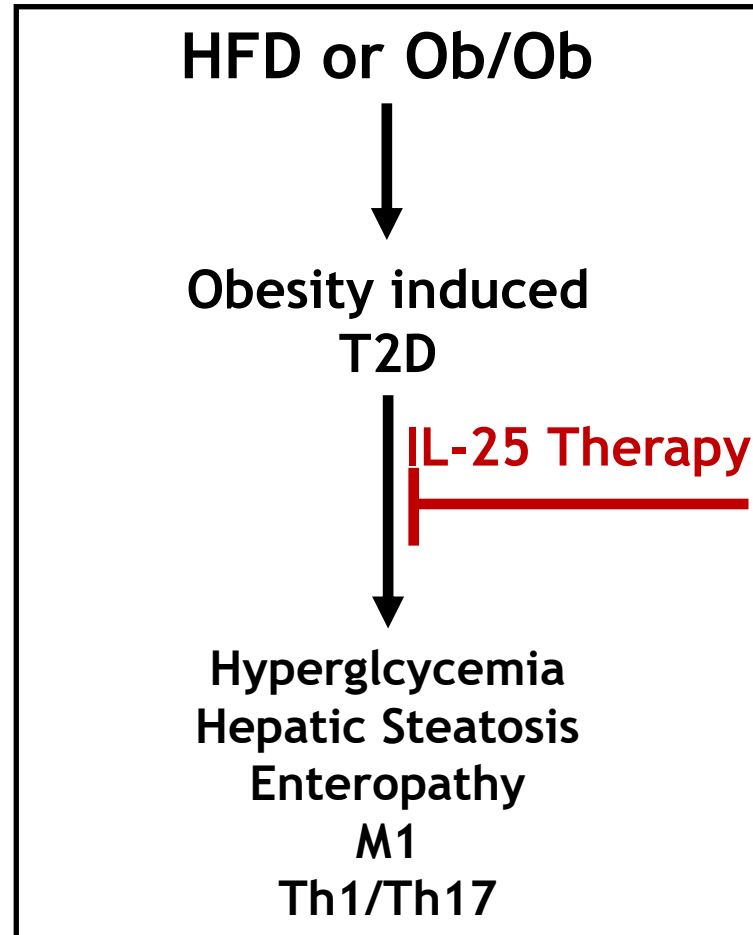

Supplement: Supplementary file 1 [file get_supplementary_file.php]
